# Supplementary material for: Septin 9 Orients the Apico–Basal Polarity Axis and Controls Plasticity Signals
Source: MDPI journal article supplement (doi:10.3390/cells12141815), 2023-07-09
Supplement: s1 [file s1]

# Supplementary

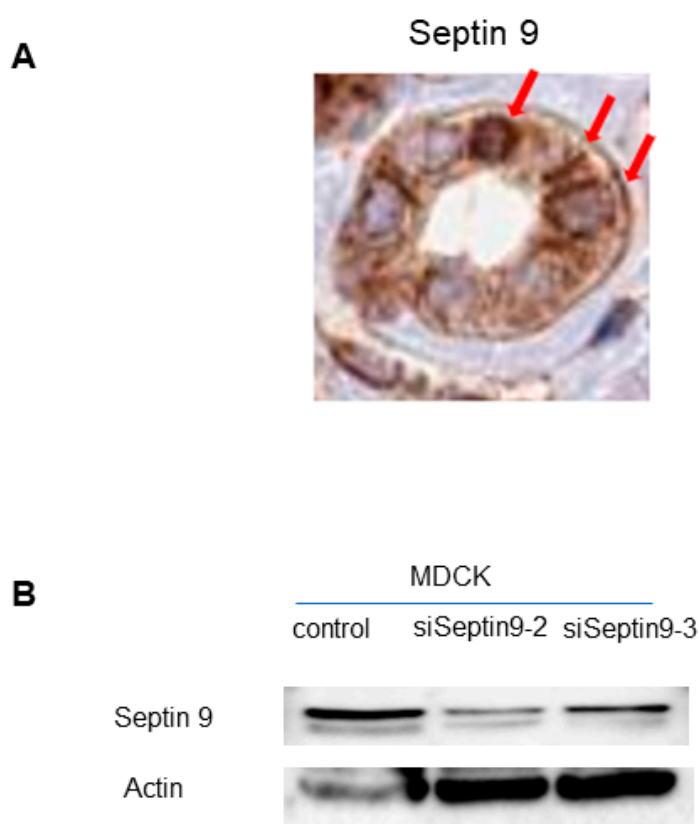

**Figure S1. Supplementary data on endogenous Septin 9 and its siRNA.**

- A. Endogenous Septin 9 staining in the tissue of a human kidney, acquired from the Protein Atlas, *HPA042564, Female, age 41, Kidney (T-71000), Normal tissue, NOS (M-00100), Patient id: 2530.*
- B. MDCK cells were transfected with scrambled siRNA (control) or with two septin 9 siRNA (siSeptin9 #2 and siSeptin9#3) for 24 h, then the medium was changed to continue grown on plates for 3 days. Cells were lysed and analyzed by western blot for the expression of septin 9 protein.

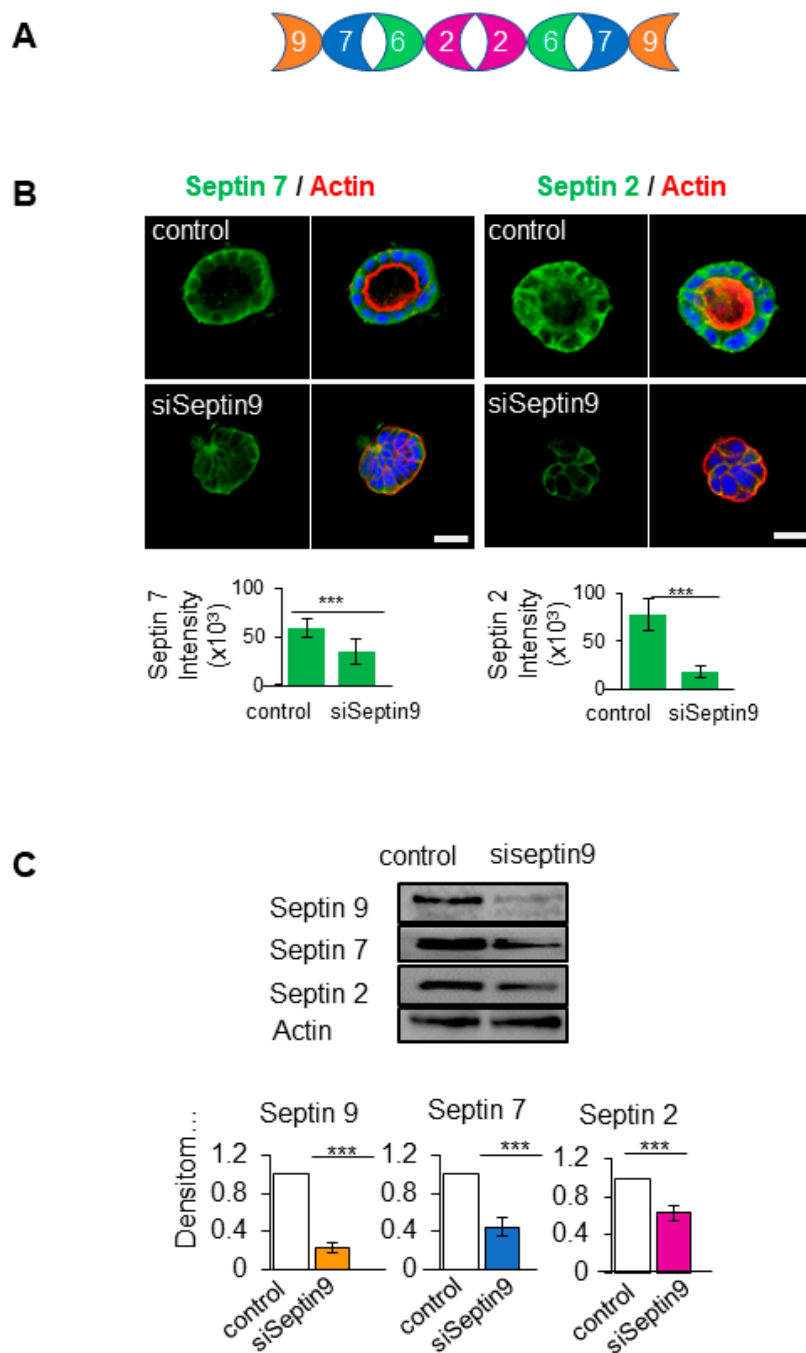

**Figure S2. Septin 9 regulates the expression of septin 2 and septin 7 and their localization at the BM**

- A. Schematic representation of the interaction between septin 9 and other septins.
- B. MDCK cells were transfected with scrambled siRNA (control) or with septin 9 siRNA for 24 h and plated on Matrigel for 4 days to form cysts, and then stained for septin 7 (green), septin 2 (green) and actin (red). A single confocal section through the middle of a cyst is shown. Scale bar 10  $\mu$ m. Quantification of the fluorescence intensity of each protein expression: septin 2 (green), and septin 7 (green).

- C. MDCK cells were transfected with scrambled siRNA (control) or with septin 9 siRNA (siSeptin9) for 24 h, then the medium was changed to continue grown on plates for 3 days. Cells were lysed and analyzed by western blot for the expression of septin 9, septin 7 and septin 2 proteins.

Data information: Data concern at least two replicates and cysts ( $n > 10$ ) for 3D staining, and three for immunoblotting. The statistical values are means  $\pm$  s.e.m. Student's t-test was used. \*\*\* $P < 0.001$ .

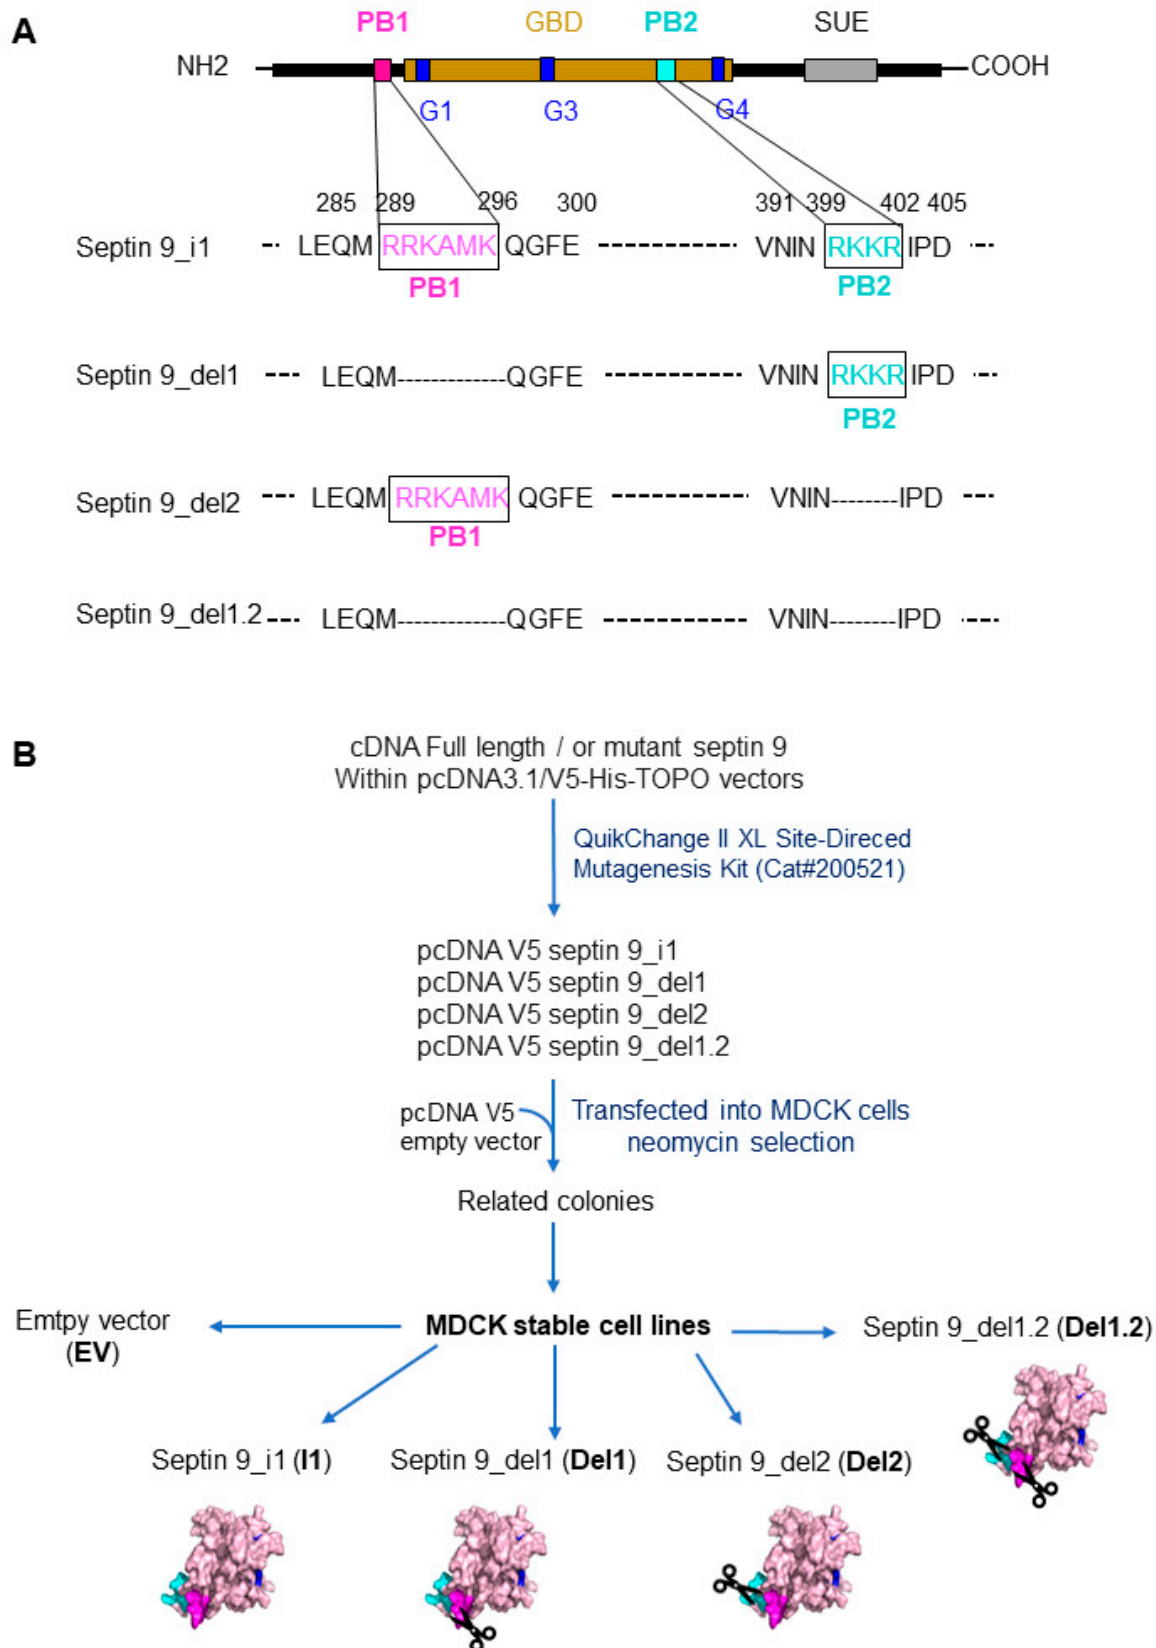

Figure S3. Constructs used during the study

- 
- A. Septin 9 domain organization and its polybasic domain 1(PB1) (RRKAMK=R<sup>289</sup>RKAMK<sup>296</sup>), and polybasic domain 2 (PB2) (RKKR=R<sup>399</sup>KKR<sup>402</sup>). We showed multiple alignments of septin 9\_i1, septin 9\_del1, septin 9\_del2 and septin 9\_del1.2.
- B. Experimental flowchart for making plasmids and the related stable MDCK cell lines, including septin 9\_empty vector (EV), septin 9\_i1(I1), septin 9\_del1(Del1), septin 9\_del2(Del2) and septin 9\_del1.2 (Del1.2) in 3D structure.

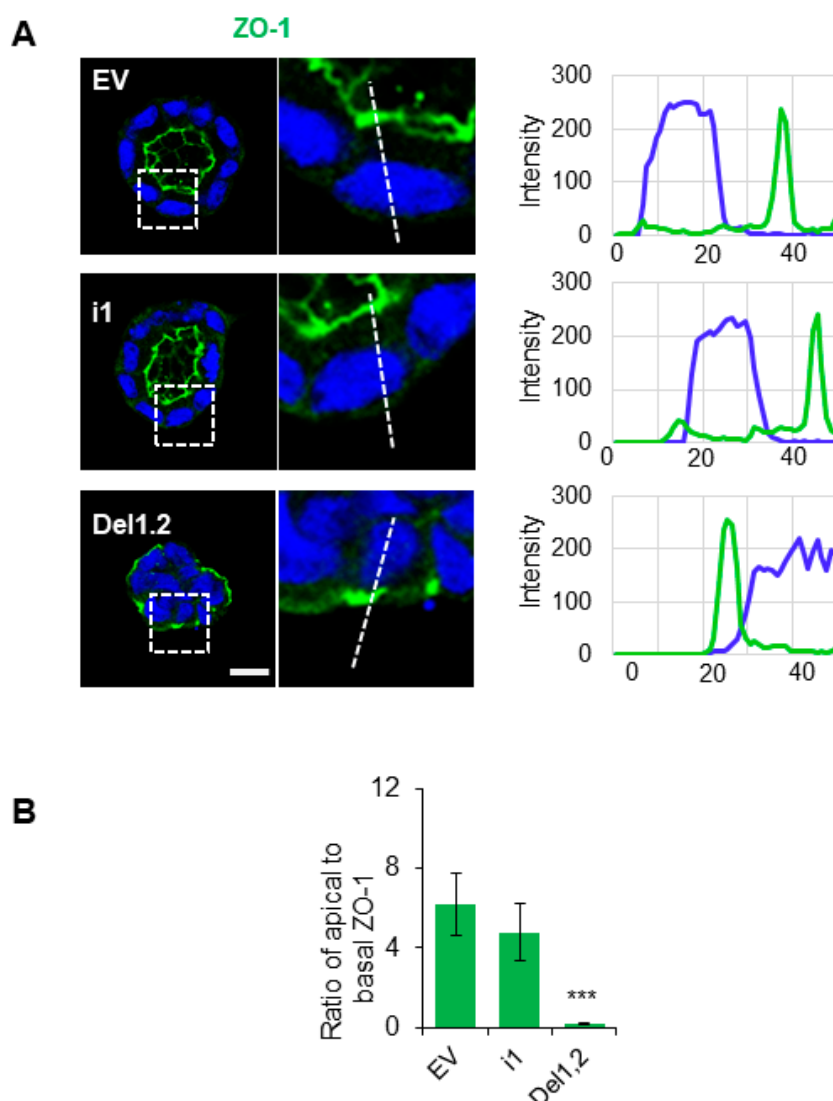

**Figure S4. The deletion of septin 9\_i1 PB domains impacts tight junctions**

- A. MDCK cells expressing EV, i1 and del1.2 were plated on Matrigel for 4 days to form cysts, and then stained for ZO-1 (green). A single confocal section through the middle of a cyst is shown. Scale bar 10 μm. Line profiles showing ZO-1 distribution from the basal to the apical areas, obtained using Image J are presented.
- B. Quantification of ZO-1 distribution: the ratio of maximal fluorescence intensity at the apical side versus maximal fluorescence intensity at the basal side, \*\*\*P < 0.001.

Data information: Data concern at least two replicates and cysts (n>10) for 3D staining. The statistical values are means ±s.e.m. Student's t-test was used. \*\*\*P < 0.001.

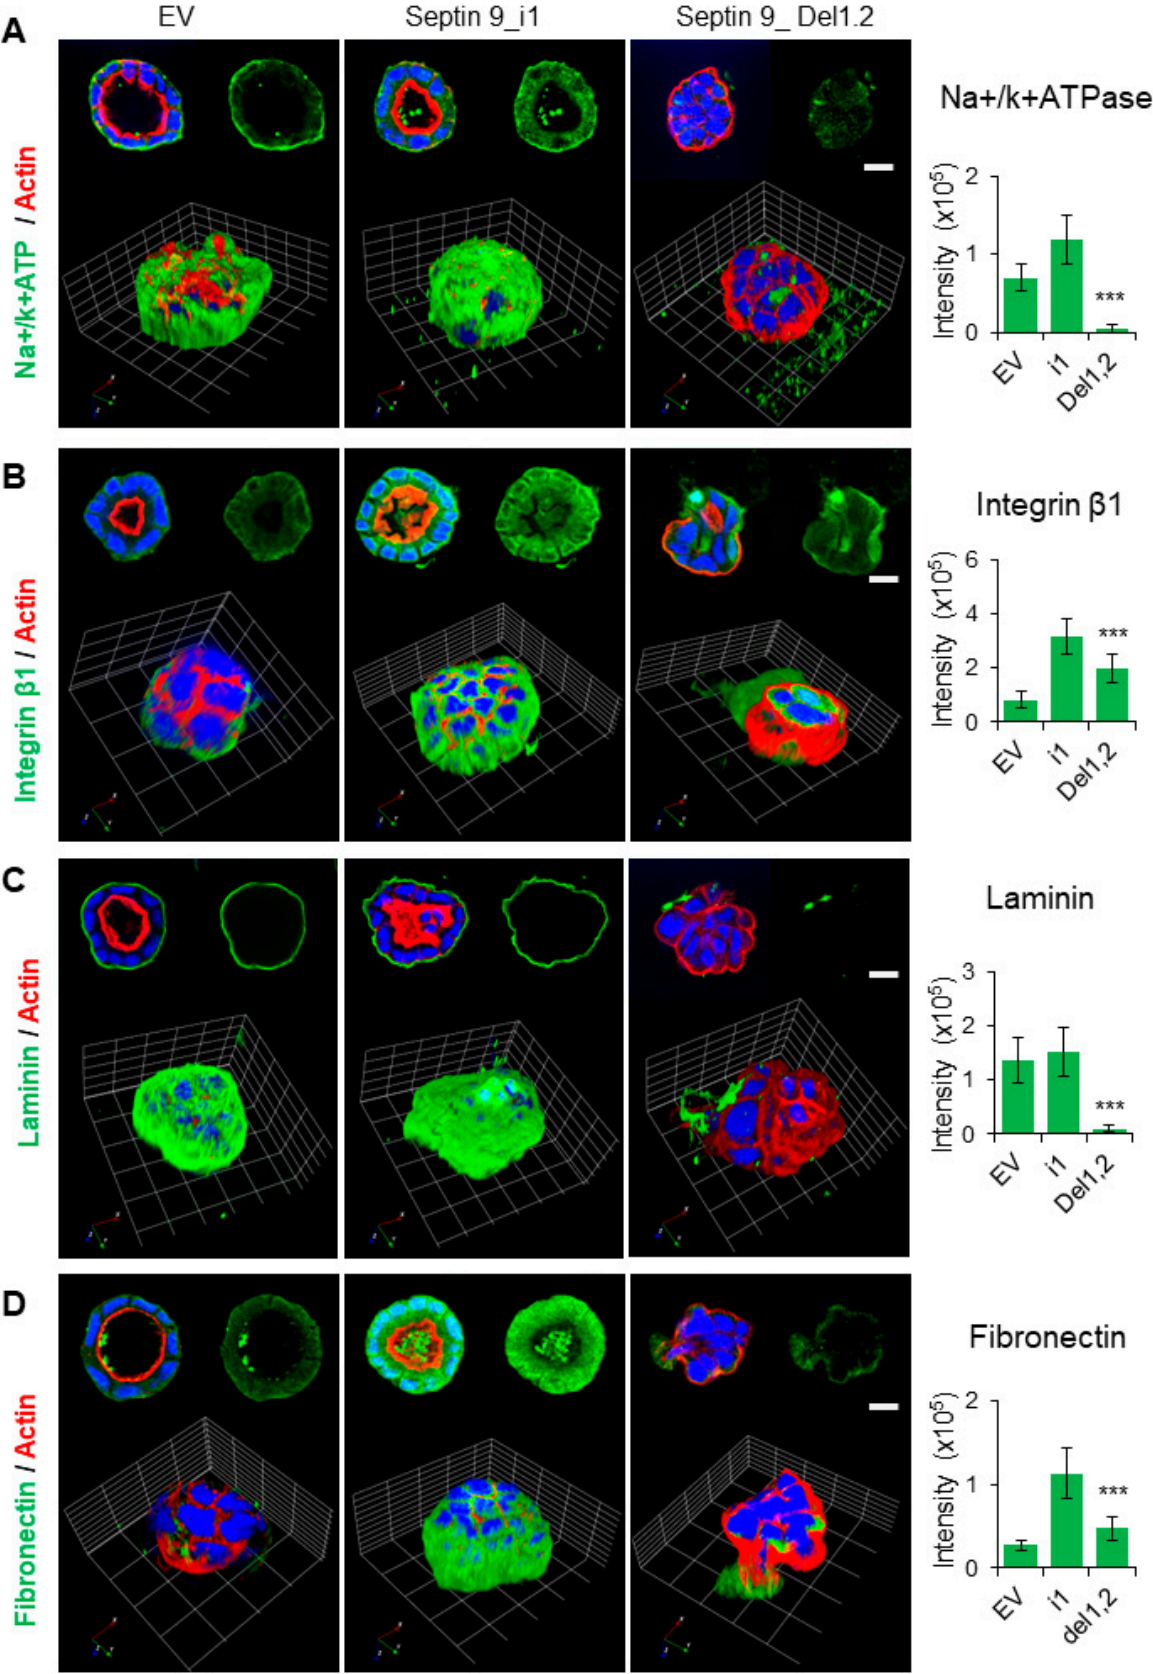

**Figure S5. The deletion of septin 9\_i1 PB domains impacts cell-ECM adhesion**

A-D. MDCK cells expressing EV, i1 and del1.2 were plated on Matrigel for 6 days to form cysts and were stained for Na<sup>+</sup>/K<sup>+</sup> ATPase (green) and actin (red), integrin  $\beta$ 1 (green) and actin (red), laminin (green) and actin (red), and fibronectin (green) and actin (red). A single confocal section through the middle of a cyst is shown. Scale bar 10  $\mu$ m. The 3D reconstructions of all cysts are presented. Quantification of the fluorescence intensity of Na<sup>+</sup>/K<sup>+</sup> ATPase, integrin  $\beta$ 1, laminin, and fibronectin is shown. The data are means  $\pm$ s.e.m. Student's t-test was used. \*\*\* $p < 0.001$ .

Data information: Data concern at least two replicates and cysts ( $n > 10$ ) for 3D staining. The statistical values are means  $\pm$ s.e.m. Student's t-test was used. \*\*\* $P < 0.001$ .



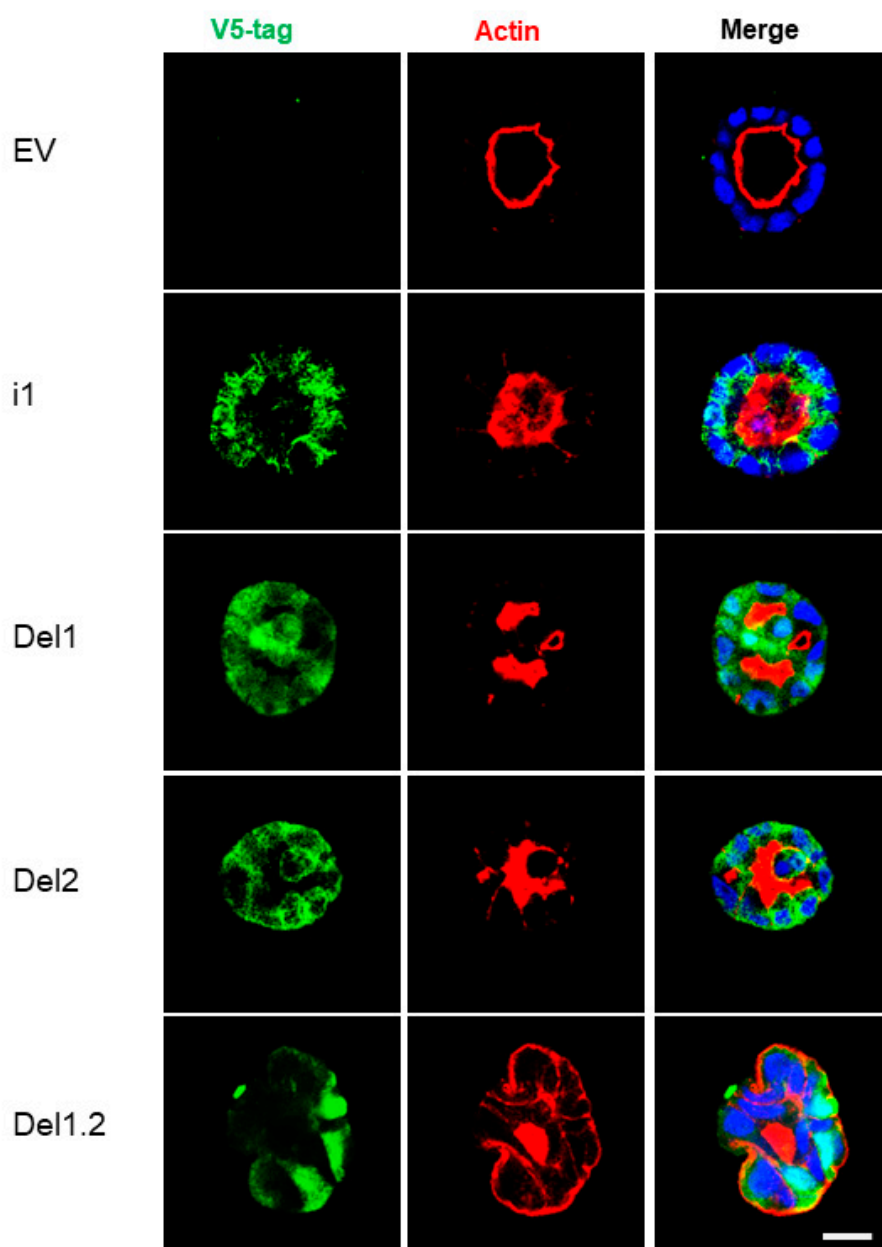

**Figure S6. Septin 9-V5 tag expression in MDCK stable cell lines at day 6**

MDCK cells expressing EV, i1, del1, del2, and del1.2 were plated on Matrigel for 6 days to form cysts and stained for septin 9- V5 tag antibody (green), and actin (red). A single confocal section through the middle of a cyst is shown. Scale bar 10  $\mu\text{m}$ .

Data information: Data concern at least two replicates and cysts ( $n > 10$ ) for 3D staining.

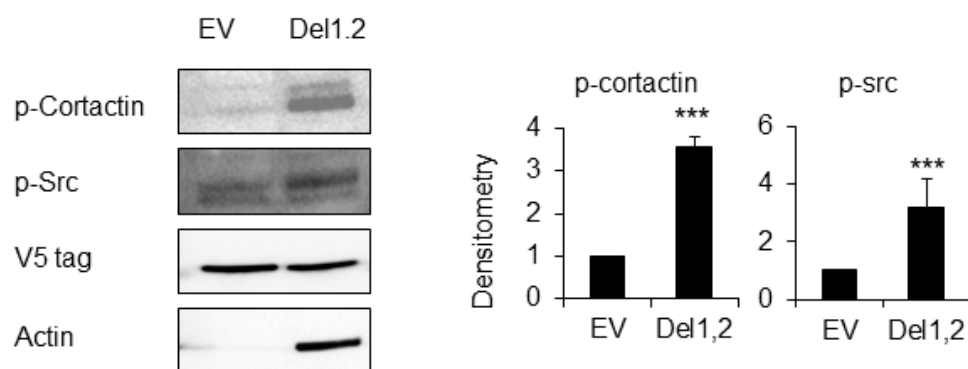

**Figure S7. The deletion of Septin 9\_i1 PB domains increases the activation of p-cortactin and p-src**

Immunoblotting of p-cortactin and p-src protein in MDCK Septin 9\_EV and Septin 9\_Del1.2.

Data information: Data concern three for immunoblotting. The statistical values are means  $\pm$  s.e.m. Student's t-test was used. \*\*\* $P < 0.001$ .

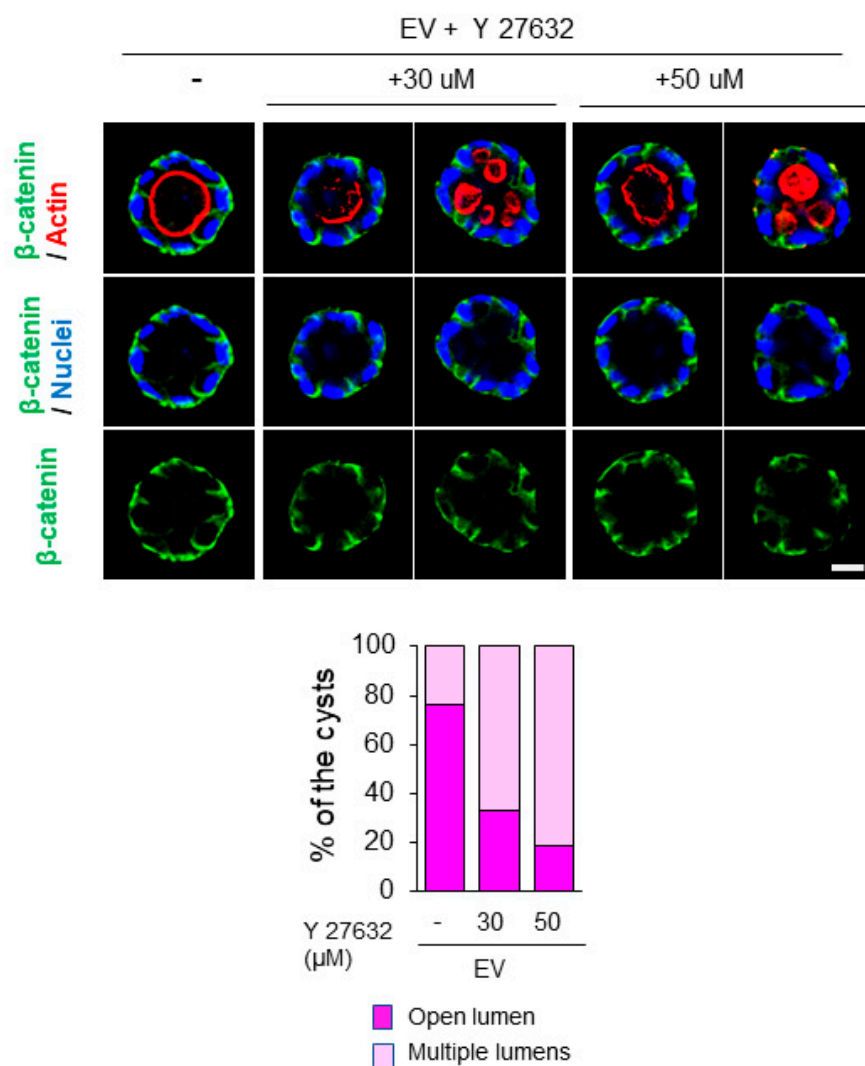

**Figure S8. The treatment of septin 9\_EV cysts with Y27632 rescues polarity**

MDCK septin 9\_EV cells were plated on Matrigel for 6 days and treated with 30  $\mu$ M and 50  $\mu$ M of Y27632. All cysts were stained with  $\beta$ -catenin (green) for the basolateral membrane, actin (red) for the apical surface and Hoechst (blue) for nuclei. Representative confocal images are shown in a single merge and nuclei. Quantification of polarized and inverted polarity phenotypes in septin 9\_EV cysts.

Data information: Data concern at least two replicates and cysts ( $n > 100$ ) for 3D staining.

**For Fig 2C**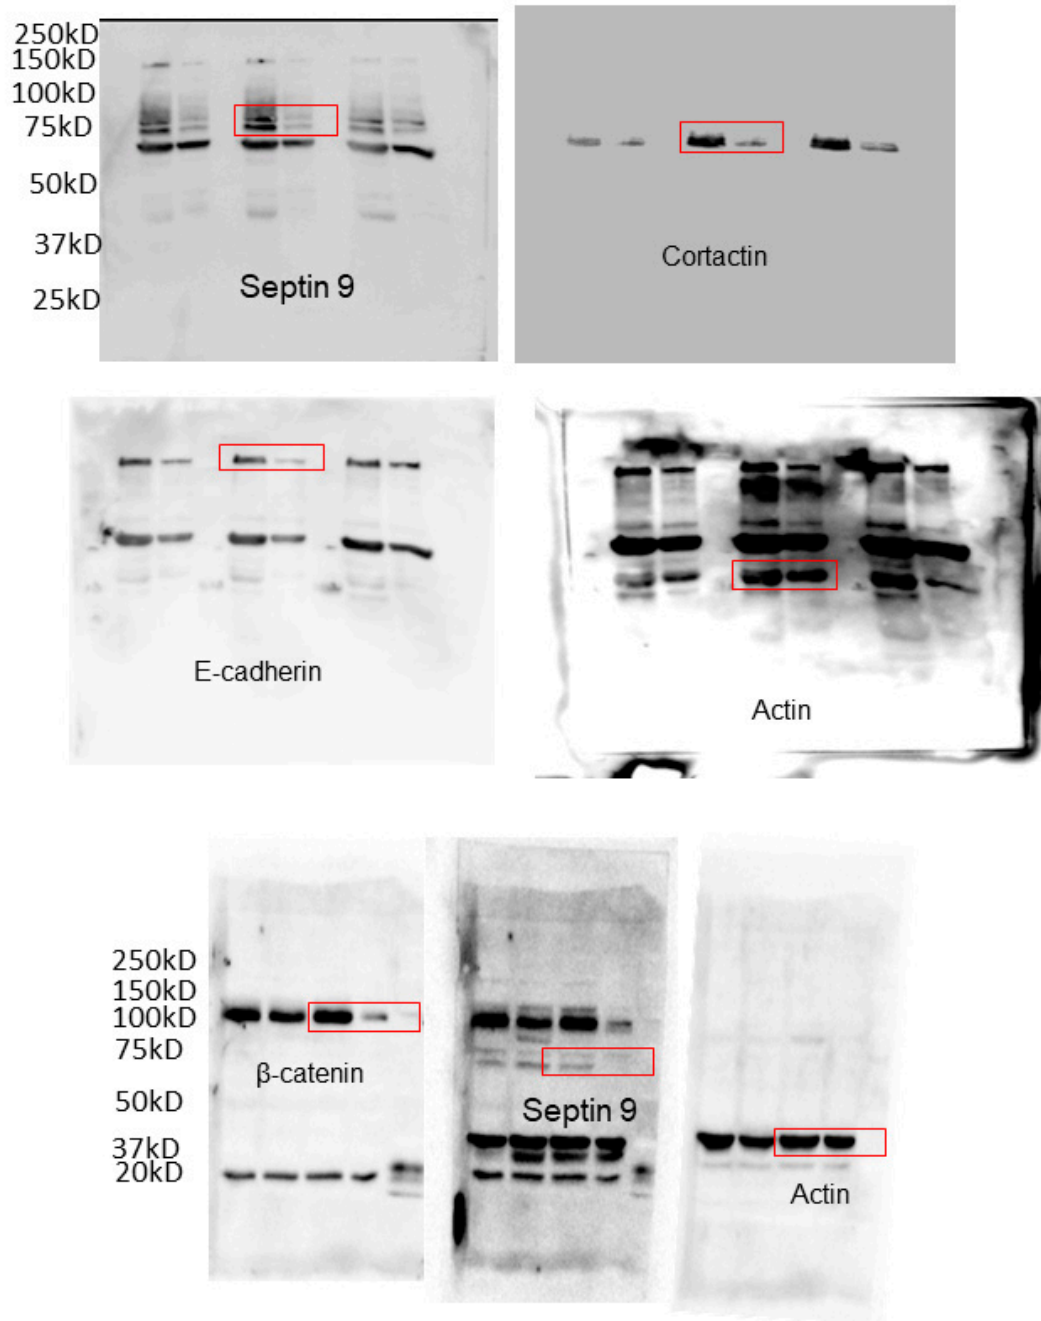

**Figure S9.** Raw data of immunoblotting related to the Fig. 2C.

**For Fig 3B**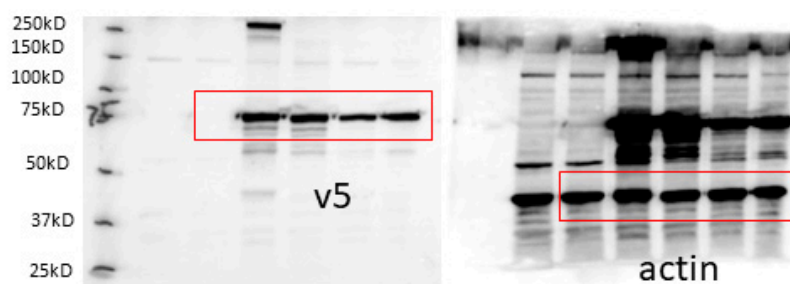**For Fig 3E**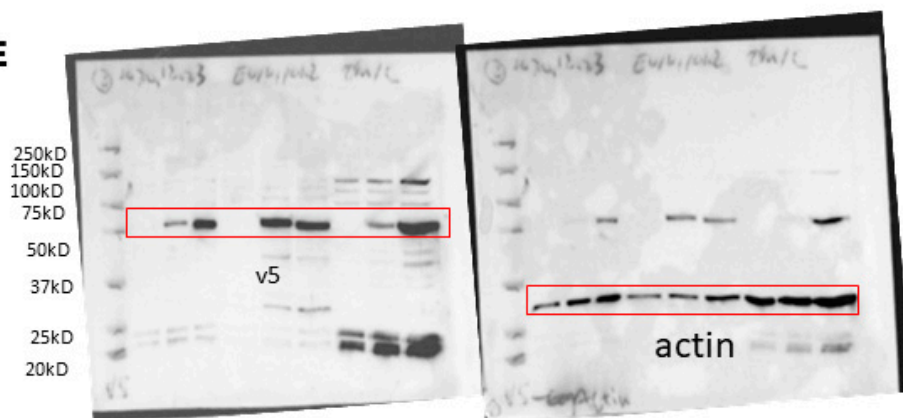**For Fig 6C**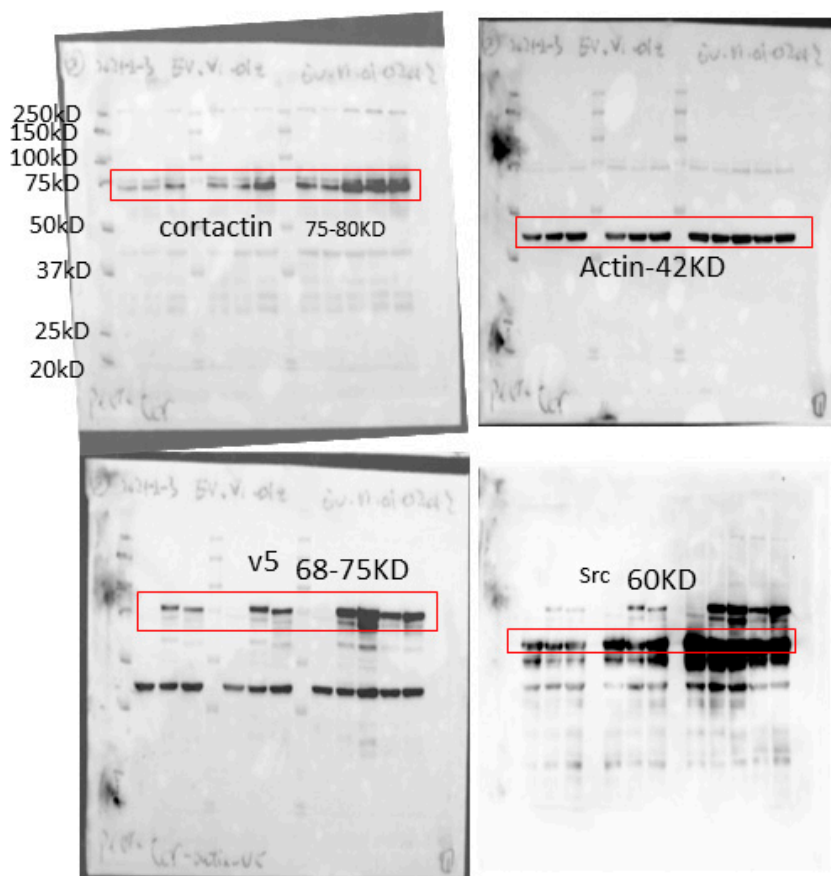

**Figure S10.** Raw data of immunoblotting related to the Fig. 3B, Fig. 3E, and Fig. 6C.

**For Fig S2C**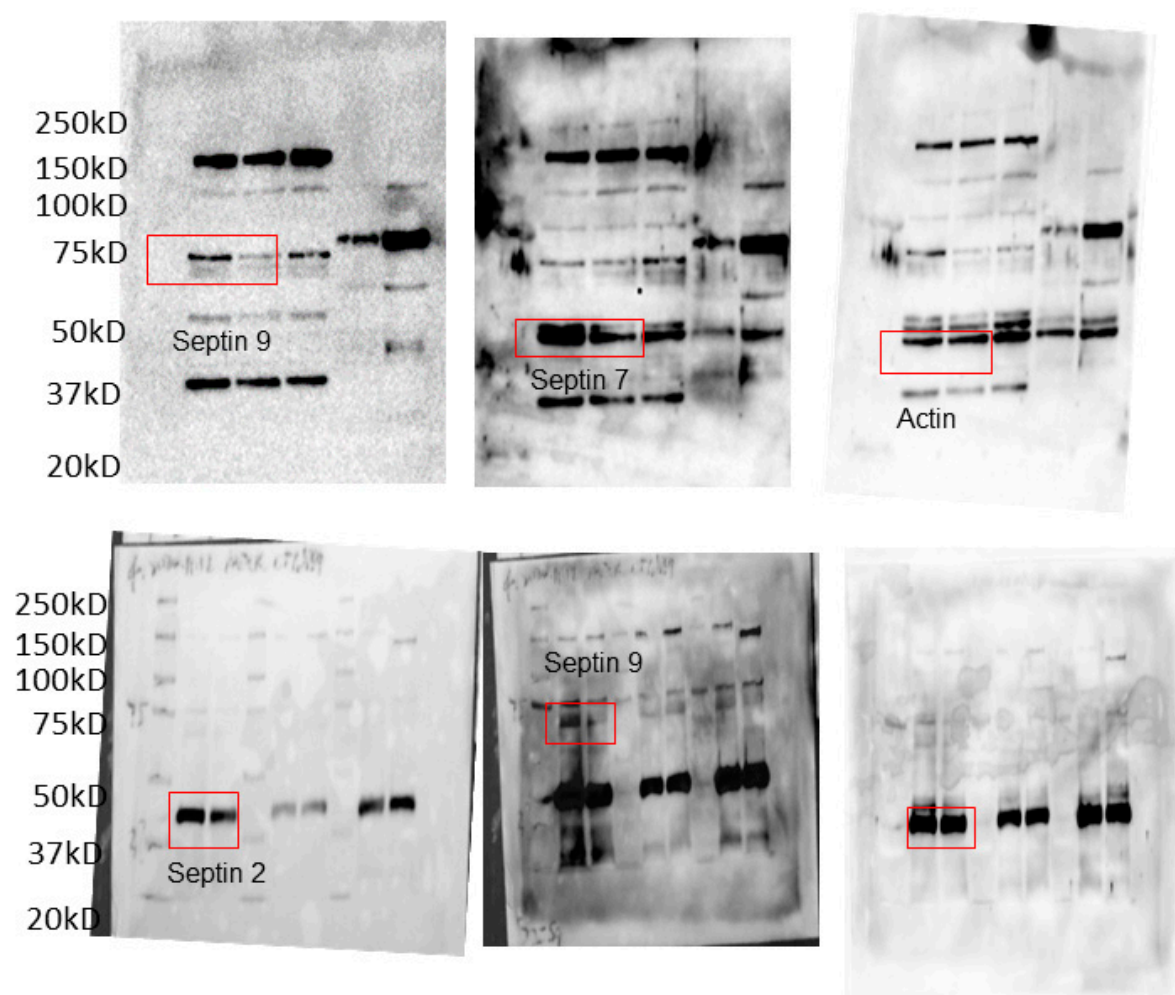

**Figure S11.** Raw data of immunoblotting related to the Fig. S2C.

**Table s1.** The sequence for the primers

| Primer name          | Forward sequence              | Reverse sequence              |
|----------------------|-------------------------------|-------------------------------|
| Canis_SEPTIN9        | GTC CAC TGC TGC CTC TAC TTC A | GGA CGA TGT TGA CCA CCT TGC T |
| Canis_Vimentin       | GCC ATC AAC ACC GAG TTC AA    | GGA AGC GCA CCT TGT CGA T     |
| Canis_N-cadherin     | CAA CTT GCC AGA AAA CTC CAG   | ATG AAA CCG GGC TAT CAG CTC   |
| Canis_ZEB1           | CAA GGT GGC CAT TCT GTT AT    | CTA GGC TGC TCA AGA CTG TAG   |
| Canis_TGF- $\beta$ 1 | GGC CAC CAT TCA TGG CAT GA    | CGT GTC CAG GCT CCA AAT GT    |
| Canis_GAPDH          | CAT CAC TGC CAC CCA GAA G     | CAG TGA GCT TCC CGT TCA G     |

**Table S1.** Primer sequences.
